# Supplementary material for: Effect of Activating Agent on the Properties of TiO2/Activated Carbon Heterostructures for Solar Photocatalytic Degradation of Acetaminophen
Source: PubMed Central journal article supplement (PMC6384744; doi:10.3390/ma12030378), 2019-01-25
Supplement: materials-12-00378-s001.pdf [file materials-12-00378-s001.pdf]

Supplementary

## Effect of Activating Agent on the Properties of TiO<sub>2</sub>/Activated Carbon Heterostructures for Solar Photocatalytic Degradation of Acetaminophen

Manuel Peñas-Garzón, Almudena Gómez-Avilés, Jorge Bedia, Juan J. Rodriguez and Carolina Belver

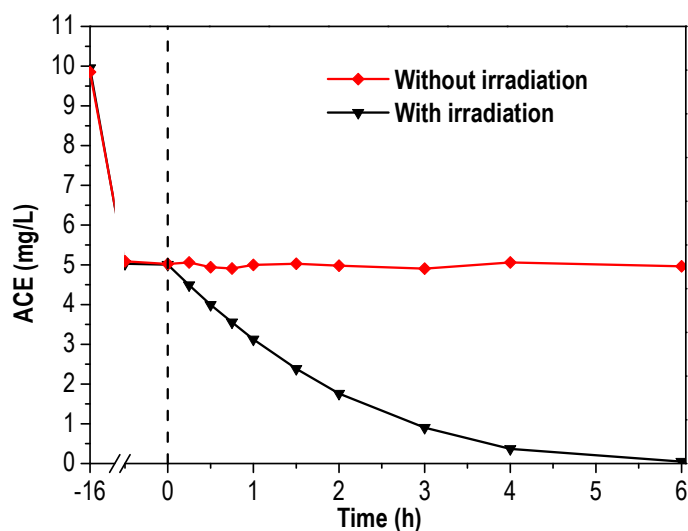

**Figure S1.** Evolution of ACE concentration with and without irradiation using TiO<sub>2</sub>/Fe-C as photocatalyst ([Photocatalyst]<sub>0</sub>: 250 mg·L<sup>-1</sup> of TiO<sub>2</sub>; [ACE]<sub>0</sub> after adsorption equilibrium: 5 mg·L<sup>-1</sup>; intensity of irradiation: 600 W·m<sup>-2</sup>).

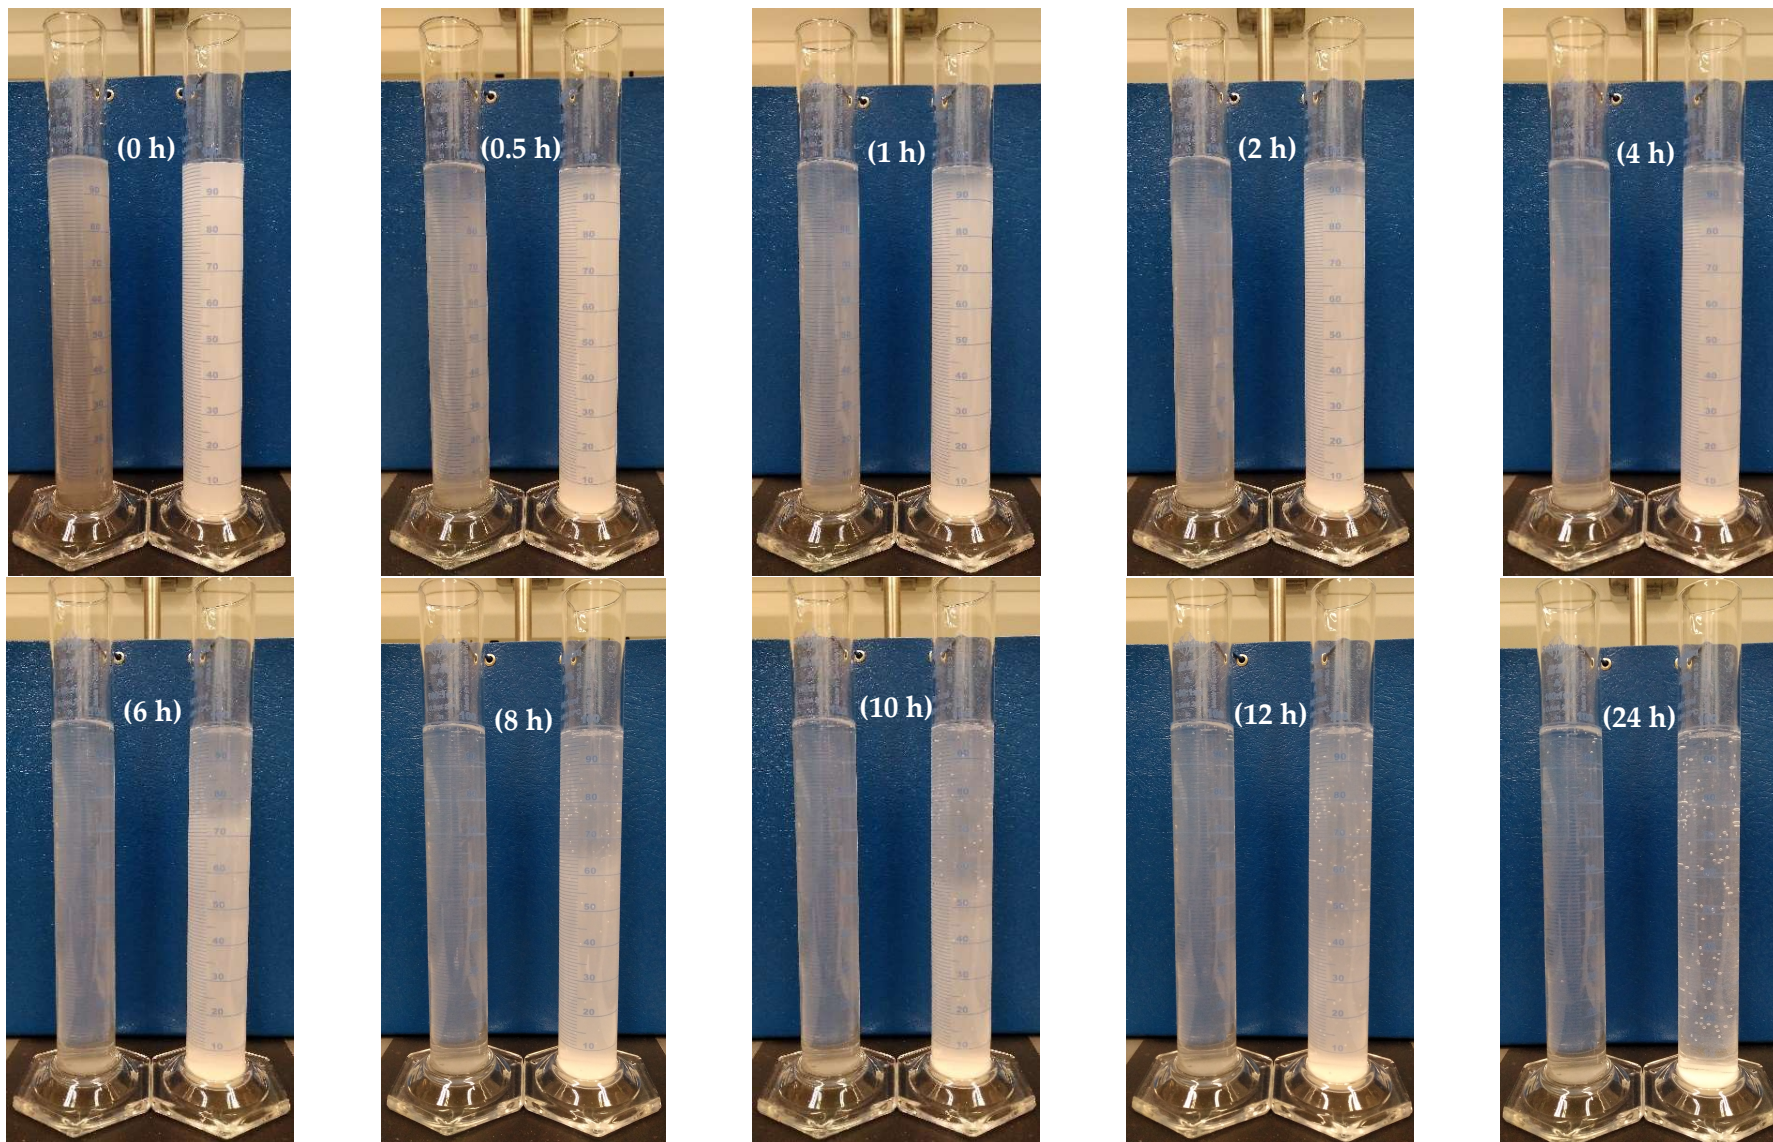

**Figure S2.** Settling test for TiO<sub>2</sub>/Fe-C (left) and TiO<sub>2</sub> (right) samples
